# Supplementary material for: Genetic ancestry and the relationship of cigarette smoking to lung function and per cent emphysema in four race/ethnic groups: a cross-sectional study
Source: HighWire-hosted journal article supplement (doi:10.1136/thoraxjnl-2012-202116), 2013-04-12
Supplement: thoraxjnl-2012-202116supp_tables.pdf [file thoraxjnl-2012-202116supp_tables.pdf]

**Web Supplemental Table 1. Characteristics of the participants with percent emphysema measures stratified by race/ethnicity and gender**

|                                                       | Men<br>(n=3,771) |                         |                         |                         | Women<br>(n=4,476)      |                          |                         |                         |                         |
|-------------------------------------------------------|------------------|-------------------------|-------------------------|-------------------------|-------------------------|--------------------------|-------------------------|-------------------------|-------------------------|
|                                                       | n = 8247         | Non-Hispanic<br>White   | African-<br>American    | Hispanic                | Chinese-<br>American    | Non-Hispanic<br>White    | African-<br>American    | Hispanic                | Chinese-<br>American    |
| n (%)                                                 |                  | 1235(30)                | 1185(31)                | 963(26)                 | 388(10)                 | 1349(30)                 | 1567(35)                | 1147(26)                | 413(9)                  |
| Age, mean (SD),<br>years                              |                  | 63(10)                  | 61(10)                  | 60(10)                  | 62(10)                  | 63(10)                   | 61(10)                  | 61(10)                  | 62(10)                  |
| Height, mean (SD),<br>cm                              |                  | 176(6.9)                | 176(7.0)                | 169(6.4)                | 168(6.0)                | 162(6.5)                 | 162(6.6)                | 156(6.1)                | 155(5.7)                |
| BMI, mean (SD), kg/m <sup>2</sup>                     |                  | 28(4.1)                 | 29(4.9)                 | 29(4.5)                 | 24(3.1)                 | 28(5.8)                  | 31(6.5)                 | 30(5.9)                 | 24(3.4)                 |
| Smoking status, n (%)                                 |                  |                         |                         |                         |                         |                          |                         |                         |                         |
| Never                                                 |                  | 497(40)                 | 453(38)                 | 395(41)                 | 207(53)                 | 660(49)                  | 842(54)                 | 776(68)                 | 397(96)                 |
| Former                                                |                  | 602(49)                 | 470(40)                 | 395(41)                 | 143(37)                 | 531(39)                  | 466(30)                 | 251(22)                 | 9(2)                    |
| Current                                               |                  | 137(11)                 | 261(22)                 | 173(18)                 | 38(10)                  | 158(12)                  | 257(16)                 | 120(10)                 | 7(2)                    |
| Pack years of<br>smoking, * median<br>[IQR]           |                  | 24.0<br>[9.0,44.0]      | 20.3<br>[8.8,36.8]      | 16.3<br>[5.9,34.5]      | 17.5<br>[5.4,33.0]      | 18.9<br>[6.0,36.8]       | 17.3<br>[6.4,33.0]      | 7.0<br>[2.0,16.5]       | 13.5<br>[2.0,19.5]      |
| Percent Emphysema<br>(%, SD)                          |                  | 29(14.1)                | 23(13.5)                | 21(12.4)                | 22(12.8)                | 19(12.5)                 | 14(11.1)                | 13(9.7)                 | 12(9.0)                 |
| Ancestral principal Components (PC),<br>median, [IQR] |                  |                         |                         |                         |                         |                          |                         |                         |                         |
| PC 1                                                  |                  | 0.027<br>[0.015, 0.043] | 0.800<br>[0.698, 0.870] | 0.073<br>[0.054, 0.169] | 0.091<br>[0.088, 0.094] | 0.0199<br>[0.015, 0.036] | 0.804<br>[0.689, 0.876] | 0.089<br>[0.062, 0.200] | 0.091<br>[0.088, 0.095] |
| PC 2                                                  |                  | 0.032<br>[0.026, 0.043] | 0.252<br>[0.222, 0.272] | 0.307<br>[0.189, 0.425] | 0.978<br>[0.971, 0.982] | 0.032<br>[0.025, 0.042]  | 0.252<br>[0.222, 0.274] | 0.299<br>[0.202, 0.432] | 0.976<br>[0.969, 0.982] |
| PC 3                                                  |                  | 0.175<br>[0.167, 0.182] | 0.250<br>[0.240, 0.259] | 0.451<br>[0.284, 0.564] | 0.027<br>[0.019, 0.038] | 0.176<br>[0.170, 0.184]  | 0.250<br>[0.240, 0.256] | 0.428<br>[0.294, 0.566] | 0.028<br>[0.019, 0.040] |

**Abbreviations**

SD, standard deviation; BMI, body mass index; IQR, inter-quartile range;

**Footnotes:**

\* Among ever smokers.

**Web supplemental Table 2. Mean difference in percent emphysema per 10 pack years of smoking, stratified by gender and race/ethnicity**

|                                               | Non-Hispanic White    | African-American       | Hispanic              | Chinese-American              | P-value for differences by self-reported race/ethnic group | P-value for differences by principal components of ancestry |
|-----------------------------------------------|-----------------------|------------------------|-----------------------|-------------------------------|------------------------------------------------------------|-------------------------------------------------------------|
| Men (n)                                       | 1,235                 | 1,185                  | 963                   | 388                           |                                                            |                                                             |
| Percent Emphysema difference (%) <sup>*</sup> | 0.17<br>(-0.11, 0.41) | -0.05<br>(-0.46, 0.36) | 0.28<br>(-0.18, 0.73) | -0.23<br>(-0.86, 0.41)        | 0.17                                                       | 0.13                                                        |
|                                               | Non-Hispanic White    | African-American       | Hispanic              | Chinese-American <sup>†</sup> | P-value for differences by self-reported race/ethnic group | P-value for differences by principal components of ancestry |
| Women (n)                                     | 1,349                 | 1,567                  | 1,147                 | 413                           |                                                            |                                                             |
| Percent Emphysema difference (%) <sup>*</sup> | 0.87<br>(0.52, 1.23)  | 0.13<br>(-0.31, 0.57)  | 0.04<br>(-0.28, 0.36) |                               | 0.03                                                       | 0.10                                                        |

<sup>\*</sup> Percent emphysema model adjusted for 10-pack-years of smoking, age, height, body mass index, CT scanner type, smoking status.

<sup>†</sup> Excluding Chinese-American women as smoking rates too low for analysis

**Web supplemental table 3: Mean difference in lung function measures per 10 pack-years of smoking stratified by gender and race/ethnicity, among participants with greater than 10 pack-years smoking history**

|                                                | Non-Hispanic Whites     | African-Americans        | Hispanics               | Chinese-Americans      | P-value for differences across self-reported race/ethnic groups [p-value excluding Chinese-Americans] | P-value for differences by principal components of ancestry [p-value excluding Chinese-Americans] |
|------------------------------------------------|-------------------------|--------------------------|-------------------------|------------------------|-------------------------------------------------------------------------------------------------------|---------------------------------------------------------------------------------------------------|
| <b>Men (n=776)</b>                             |                         |                          |                         |                        |                                                                                                       |                                                                                                   |
| n.                                             | 310                     | 217                      | 157                     | 92                     |                                                                                                       |                                                                                                   |
| FEV <sub>1</sub> /FVC difference (%), (95% CI) | -0.81<br>(-1.23, -0.39) | -0.10<br>(-0.92, 0.71)   | -0.56<br>(-1.22, 0.10)  | -0.16<br>(-0.98, 0.66) | 0.66                                                                                                  | 0.62                                                                                              |
| FEV <sub>1</sub> difference (mL), (95% CI)     | -45.7<br>(-69.9, -21.2) | -4.42<br>(-49.2, 40.3)   | -36.9<br>(-72.1, -1.8)  | 4.56<br>(-29.8, 38.9)  | 0.06<br>[0.31]                                                                                        | 0.09<br>[0.39]                                                                                    |
| <b>Women (n=457)</b>                           |                         |                          |                         |                        |                                                                                                       |                                                                                                   |
| n.                                             | 235                     | 159                      | 56                      | 7                      |                                                                                                       |                                                                                                   |
| FEV <sub>1</sub> /FVC difference (%), (95% CI) | -1.05<br>(-1.41, 0.69)  | -0.77<br>(-1.24, -0.31)  | -0.73<br>(-1.30, -0.16) |                        | 0.78                                                                                                  | 0.68                                                                                              |
| FEV <sub>1</sub> difference (mL), (95% CI)     | -34.8<br>(-60.2, -9.3)  | -68.7<br>(-100.7, -36.7) | -24.1<br>(-72.3, 24.0)  |                        | 0.99                                                                                                  | 0.87                                                                                              |

\* Model adjusted for 10-pack-years of smoking, age, age<sup>2</sup>, height, height<sup>2</sup>, current smoking status, physician-diagnosed asthma before 45 years, family history of emphysema, cigar smoking status, cigar pack-years, second-hand smoke exposure, depth of inhalation, time before first cigarette in the morning, urinary cotinine level, history of hayfever, occupational exposure to dust, fumes or smoke, and educational attainment.

† Chinese-American women excluded from analysis due to small sample size with smoking history

**Web Supplemental Table 4. Mean difference in lung function measures per 10 pack-years of smoking, stratified by gender and race/ethnicity, and including adjustment for immigrant status and years lived in United States**

|                                                | Non-Hispanic Whites     | African-Americans       | Hispanics               | Chinese-Americans      | P-value for differences across self-reported race/ethnic groups [p-value excluding Chinese-Americans] | P-value for differences by principal components of ancestry [p-value excluding Chinese-Americans] |
|------------------------------------------------|-------------------------|-------------------------|-------------------------|------------------------|-------------------------------------------------------------------------------------------------------|---------------------------------------------------------------------------------------------------|
| Men                                            |                         |                         |                         |                        |                                                                                                       |                                                                                                   |
| n.                                             | 582                     | 402                     | 342                     | 283                    |                                                                                                       |                                                                                                   |
| FEV <sub>1</sub> /FVC difference (%), (95% CI) | -0.73<br>(-1.00, -0.46) | -0.85<br>(-1.37, -0.33) | -0.83<br>(-1.24, 0.41)  | -0.26<br>(-0.81, 0.29) | 0.19                                                                                                  | 0.11                                                                                              |
| FEV <sub>1</sub> difference (mL), (95% CI)     | -53.4<br>(-69.8, -36.9) | -41.9<br>(-68.8, -15.0) | -48.9<br>(-73.7, -24.0) | -14.4<br>(-43.1, 14.3) | 0.01<br>[0.91]                                                                                        | 0.004<br>[0.38]                                                                                   |
| Women                                          | Non-Hispanic Whites     | African-Americans       | Hispanics               | Chinese-Americans†     | P-value for differences across self-reported race/ethnic groups                                       | P-value for differences by principal components of ancestry                                       |
| n.                                             | 591                     | 471                     | 395                     | 278                    |                                                                                                       |                                                                                                   |
| FEV <sub>1</sub> /FVC difference (%), (95% CI) | -1.05<br>(-1.41, 0.69)  | -0.77<br>(-1.24, -0.31) | -0.73<br>(-1.30, -0.16) |                        | 0.43                                                                                                  | 0.31                                                                                              |
| FEV <sub>1</sub> difference (mL), (95% CI)     | -42.3<br>(-59.3, -25.3) | -43.8<br>(-63.9, -23.6) | -36.5<br>(-64.2, -8.7)  |                        | 0.52                                                                                                  | 0.59                                                                                              |

\* Model adjusted for 10-pack-years of smoking, age, age<sup>2</sup>, height, height<sup>2</sup>, current smoking status, physician-diagnosed asthma before 45 years, family history of emphysema, cigar smoking status, cigar pack-years, second-hand smoke exposure, depth of inhalation, time before first cigarette in the morning, urinary cotinine level, history of hayfever, occupational exposure to dust, fumes or smoke, and educational attainment.

† Chinese-American women excluded from analysis due to small sample size with smoking history

**Web Supplemental Table 5. Mean difference in lung function measures per 10 pack-years of smoking, stratified by gender and race/ethnicity, among participants age 45-65 years.**

|                                                | Non-Hispanic Whites      | African-Americans       | Hispanics              | Chinese-Americans      | P-value for differences across self-reported race/ethnic groups [p-value excluding Chinese-Americans] | P-value for differences by principal components of ancestry [p-value excluding Chinese-Americans] |
|------------------------------------------------|--------------------------|-------------------------|------------------------|------------------------|-------------------------------------------------------------------------------------------------------|---------------------------------------------------------------------------------------------------|
| <b>Men (n=857)</b>                             |                          |                         |                        |                        |                                                                                                       |                                                                                                   |
| n.                                             | 292                      | 223                     | 204                    | 138                    |                                                                                                       |                                                                                                   |
| FEV <sub>1</sub> /FVC difference (%), (95% CI) | -0.70<br>(-1.23, -0.18)  | -0.22<br>(-0.94, -0.50) | -0.43<br>(-1.34, 0.47) | -0.50<br>(-1.82, 0.83) | 0.16                                                                                                  | 0.11                                                                                              |
| FEV <sub>1</sub> difference (mL), (95% CI)     | -52.4<br>(-86.7, -18.02) | -21.3<br>(-64.6, 22.0)  | 0.74<br>(-67.7, 69.2)  | -59<br>(139.4, 21.1)   | 0.08                                                                                                  | 0.02<br>[0.02]                                                                                    |
| <b>Women (n=902)</b>                           |                          |                         |                        | Chinese-Americans†     | P-value for differences across self-reported race/ethnic groups                                       | P-value for differences by principal components of ancestry                                       |
| n.                                             | 303                      | 231                     | 224                    | 144                    |                                                                                                       |                                                                                                   |
| FEV <sub>1</sub> /FVC difference (%), (95% CI) | -0.58<br>(-1.22, -0.06)  | -0.18<br>(-1.14, 0.77)  | -0.33<br>(-1.04, 0.37) |                        | 0.38                                                                                                  | 0.14                                                                                              |
| FEV <sub>1</sub> difference (mL), (95% CI)     | -34.7<br>(-207, 344)     | -33.6<br>(-79.0, 11.9)  | -50.8<br>(-94.0, -7.5) |                        | 0.73                                                                                                  | 0.74                                                                                              |

\* Model adjusted for 10-pack-years of smoking, age, age<sup>2</sup>, height, height<sup>2</sup>, current smoking status, physician-diagnosed asthma before 45 years, family history of emphysema, cigar smoking status, cigar pack-years, second-hand smoke exposure, depth of inhalation, time before first cigarette in the morning, urinary cotinine level, history of hayfever, occupational exposure to dust, fumes or smoke, and educational attainment.

† Chinese-American women excluded from analysis due to small sample size with smoking history

**Web Supplemental Table 6:  
Interaction between principal components of ancestry and lung function measures, stratified by site and gender**

|                               | Men    | Women |
|-------------------------------|--------|-------|
| Winston-Salem, North Carolina | n= 298 | n=299 |
| FEV <sub>1</sub> /FVC         | 0.46   | 0.08  |
| FEV <sub>1</sub>              | 0.17   | 0.47  |
| New York, New York            | n=341  | n=397 |
| FEV <sub>1</sub> /FVC         | 0.31   | 0.08  |
| FEV <sub>1</sub>              | 0.56   | 0.1   |
| Baltimore, Maryland           | n=243  | n=245 |
| FEV <sub>1</sub> /FVC         | 0.03   | 0.78  |
| FEV <sub>1</sub>              | 0.12   | 0.22  |
| Minnesota                     | n=287  | n=263 |
| FEV <sub>1</sub> /FVC         | 0.58   | 0.19  |
| FEV <sub>1</sub>              | 0.75   | 0.82  |
| Chicago, Illinois             | n=366  | n=372 |
| FEV <sub>1</sub> /FVC         | 0.09   | 0.71  |
| FEV <sub>1</sub>              | 0.11   | 0.14  |
| Los Angeles, California       | n=420  | n=434 |
| FEV <sub>1</sub> /FVC         | 0.25   | 0.05  |
| FEV <sub>1</sub>              | 0.07   | 0.03  |
