# Supplementary figures and images for: Genetic ancestry and the relationship of cigarette smoking to lung function and per cent emphysema in four race/ethnic groups: a cross-sectional study
Source: HighWire-hosted journal article supplement (doi:10.1136/thoraxjnl-2012-202116), 2013-04-12

Supplemental Figure 1a.

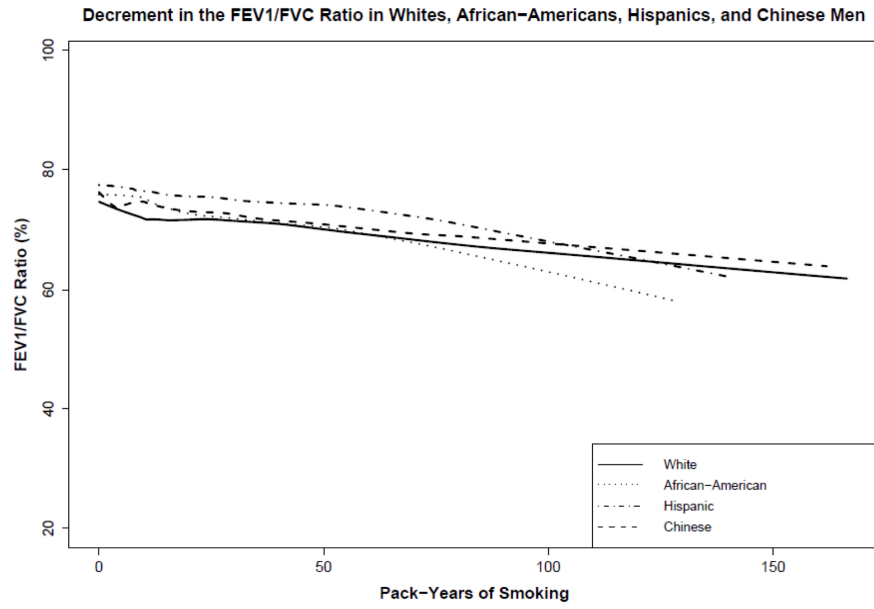

Supplemental Figure 1b.

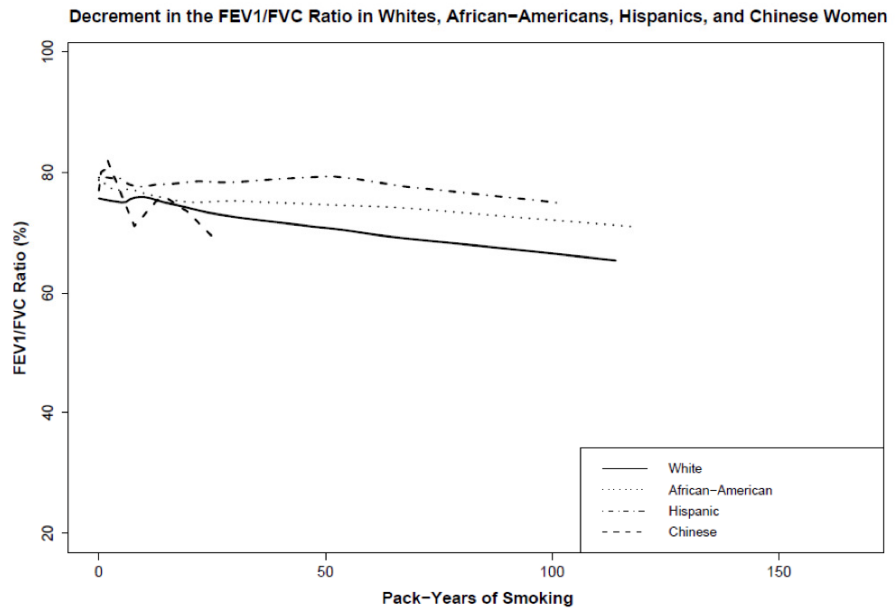

Supplement: thoraxjnl-2012-202116supp_figures.pdf [file thoraxjnl-2012-202116supp_figures.pdf]
